# Supplementary material for: Strong cellulase inhibitors from the hydrothermal pretreatment of wheat straw
Source: Springer Nature journal article supplement (doi:10.1186/1754-6834-6-135), 2013-09-21

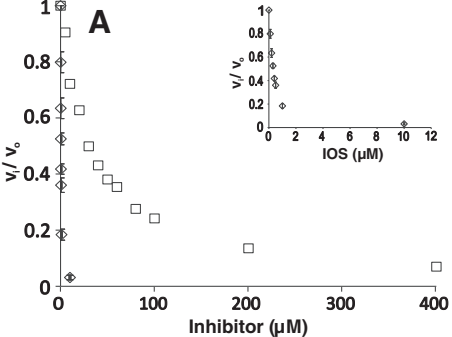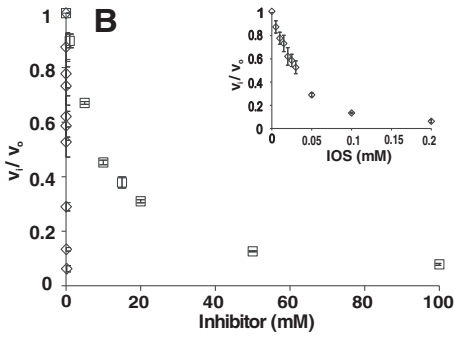

Supplement: 13068_2013_358_MOESM7_ESM.pdf [file 13068_2013_358_MOESM7_ESM.pdf]
